# Supplementary material
Source: publisher figshare collection journal article supplement (https://acs.figshare.com/ndownloader/files/14579768)
Supplement: Supplementary file 1 [file 14579768]

**A comparative study on the carbonation activated calcium  
silicates as sustainable binders: Reactivity, mechanical  
performance and microstructure**

*Yuandong Mu <sup>a, b</sup>, Zhichao Liu <sup>a, b</sup>, Fazhou Wang <sup>a, b \*</sup>*

<sup>a</sup> School of Materials Science and Engineering, Wuhan University of Technology,  
Wuhan, 430070, China

<sup>b</sup> State Key Laboratory of Silicate Materials for Architectures, Wuhan University of  
Technology, Wuhan, 430070, China

\* Corresponding author. State Key Laboratory of Silicate Materials for Architectures,  
Wuhan University of Technology, 122 Luoshi Road, Wuhan, 430070 China.

Tel.: +86 027 87227128.

E-mail address: fzhwang@whut.edu.cn (F. Wang)

---

## Table of Contents

**Figure S1.** XRD patterns of carbonated  $C_3S$  with 10 wt. %  $Al_2O_3$  as internal standard.

**Figure S2.** XRD patterns of carbonated  $\beta$ - $C_2S$  with 10 wt. %  $Al_2O_3$  as internal standard.

**Figure S3.** XRD patterns of carbonated  $\gamma$ - $C_2S$  with 10 wt. %  $Al_2O_3$  as internal standard.

**Figure S4.** XRD patterns of carbonated  $C_3S_2$  with 10 wt. %  $Al_2O_3$  as internal standard.

**Figure S5.** XRD patterns of carbonated  $CS$  with 10 wt. %  $Al_2O_3$  as internal standard.

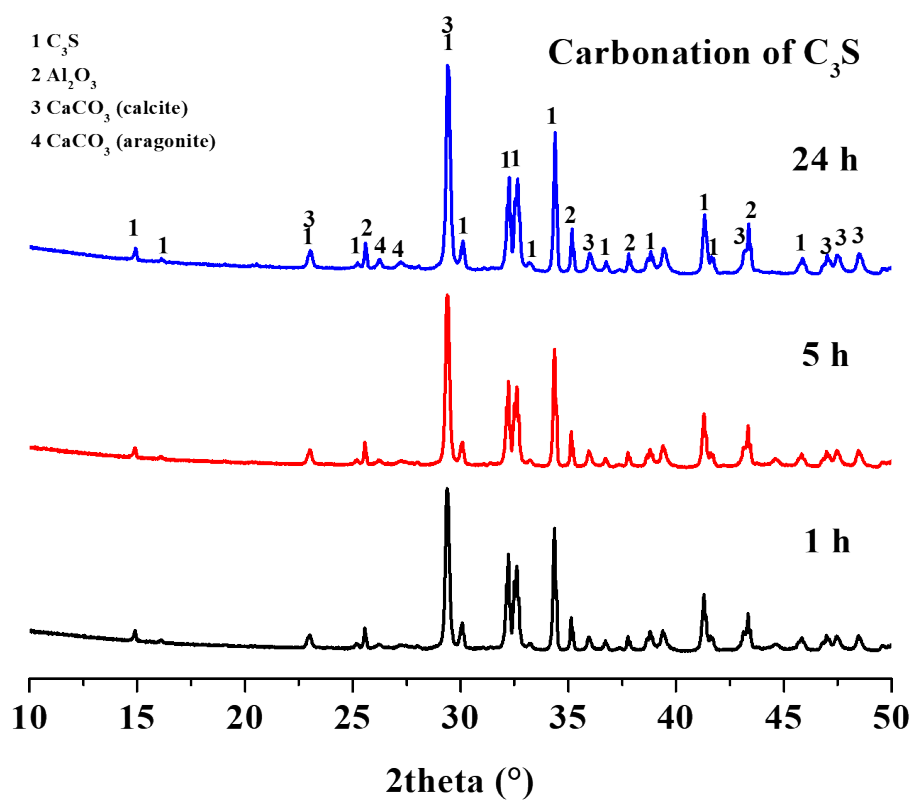

**Figure S1.** XRD patterns of carbonated C<sub>3</sub>S with 10 wt. % Al<sub>2</sub>O<sub>3</sub> as internal standard.

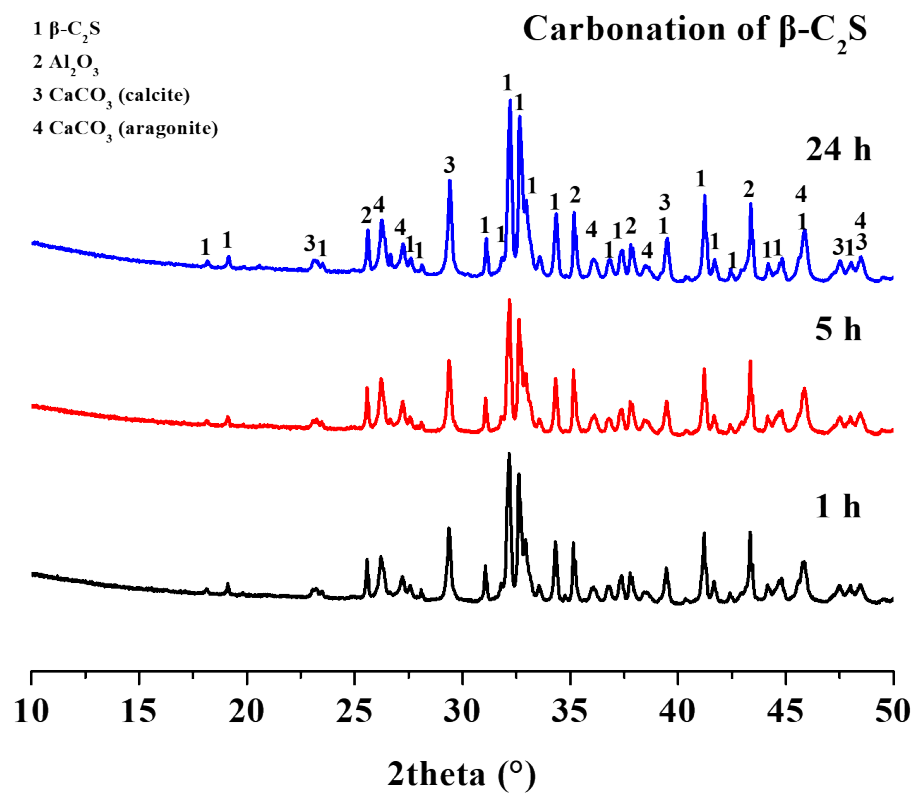

**Figure S2.** XRD patterns of carbonated  $\beta$ -C<sub>2</sub>S with 10 wt. % Al<sub>2</sub>O<sub>3</sub> as internal standard.

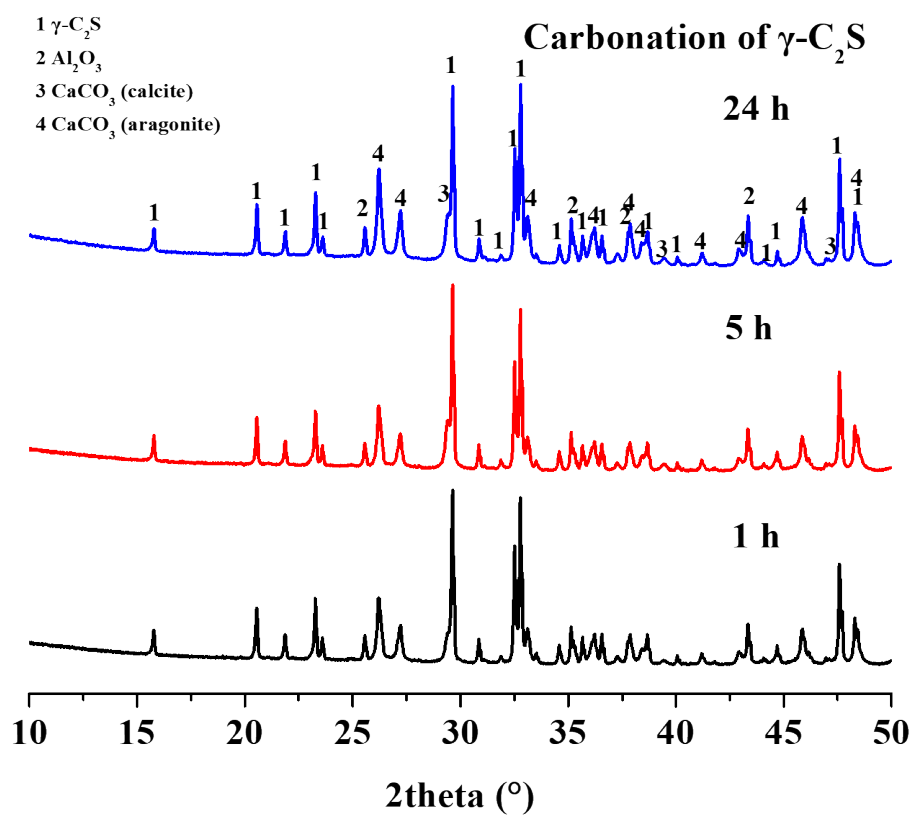

**Figure S3.** XRD patterns of carbonated  $\gamma$ -C<sub>2</sub>S with 10 wt. % Al<sub>2</sub>O<sub>3</sub> as internal standard.

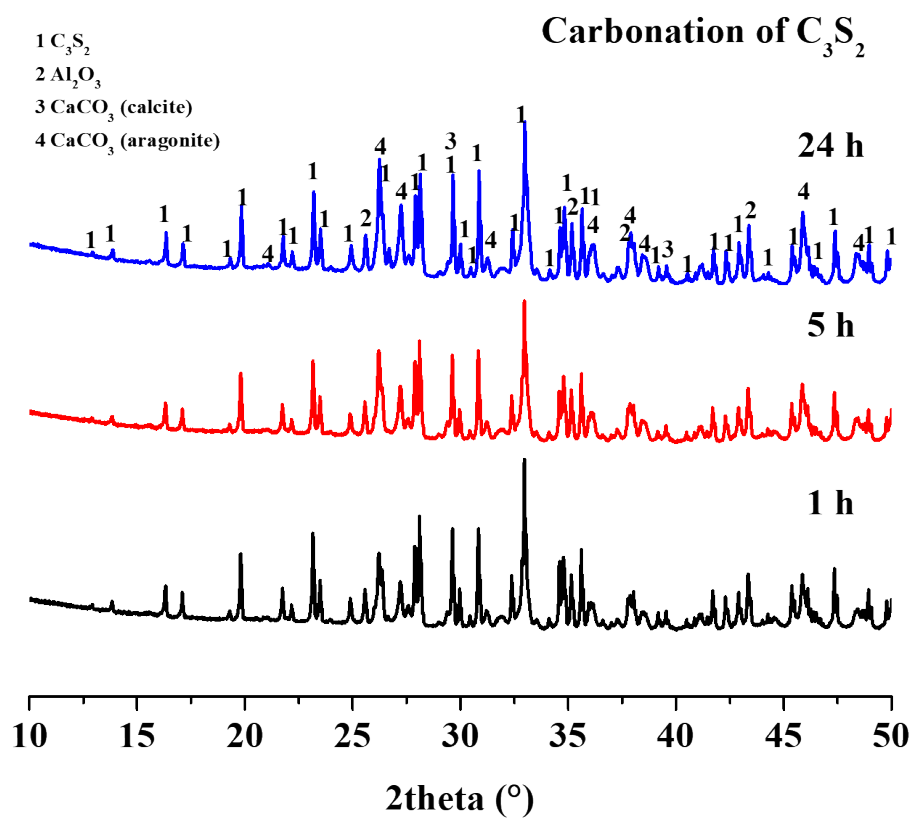

**Figure S4.** XRD patterns of carbonated  $C_3S_2$  with 10 wt. %  $Al_2O_3$  as internal standard.

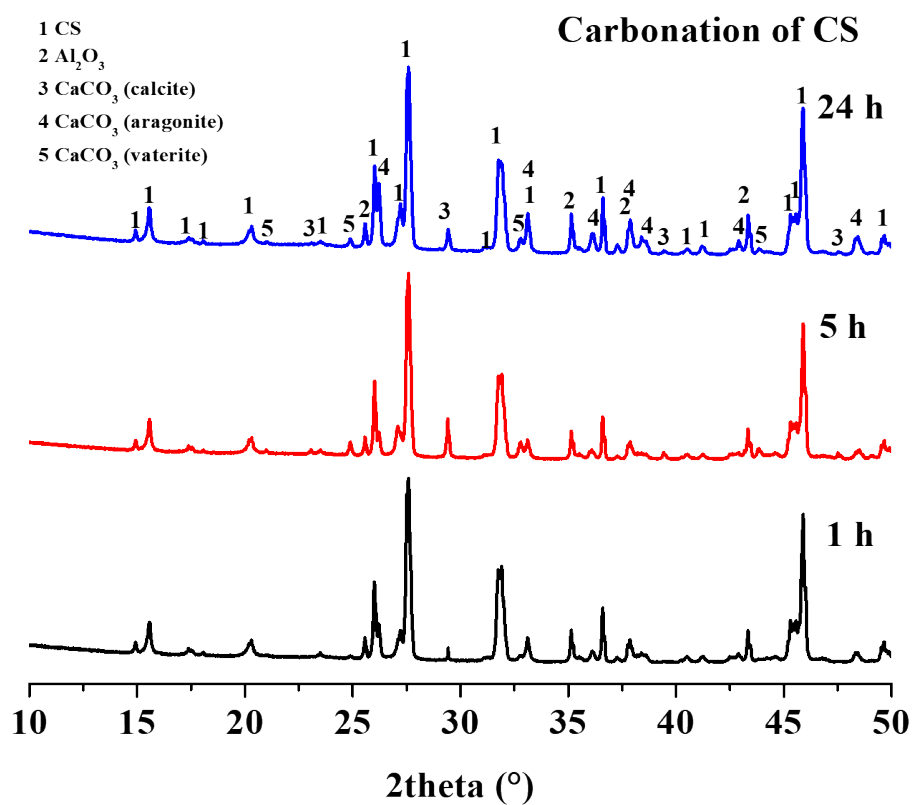

**Figure S5.** XRD patterns of carbonated CS with 10 wt. %  $\text{Al}_2\text{O}_3$  as internal standard.
